# Supplementary material for: Ugandan Physician Attitudes towards a Potential, Local Trauma Fellowship Program
Source: Research Square preprint supplement (doi:10.21203/rs.3.rs-5688403/v1), 2025-01-01
Supplement: Supplementary file 2 [file c549e57ac6c81929a9639f5d.docx]

## Consultant Survey Questions

Q1 What is your age?

- 20-30 years
- 31-40 years
- 41 -50 years
- 51+ years

Q2 What is your gender?

- Female
- Male

Q3 What is your specialty?

- Cardiothoracic surgery
- Critical care / anaesthesia
- Ear, nose, and throat surgery
- General surgery
- Neurosurgery
- Obstetrics and gynaecology
- Ophthalmology
- Oral and maxillofacial surgery
- Orthopaedic surgery
- Plastic and reconstructive surgery
- Urology
- Vascular surgery
- Other __________________________________________________

Display This Question:

If Specialty = Cardiothoracic surgery

Q4a Rank the procedures from your field that you think every trauma specialist should know (1 = most important).

______ Thoracostomy

______ Thoracotomy

______ Esophageal repair

______ Chest wall repair/plating

______ Thoracic vascular repair

______ Diaphragmatic repair

Display This Question:

If Specialty = Critical care / anaesthesia

Q4b Rank the skills and problems from your field that you think every trauma specialist should know how to manage (1 = most important).

______ Sedation

______ Advanced airway management (e.g. intubation)

______ Ventilator management

______ Distributive shock (anaphylactic, septic, neurogenic)

______ Hypovolemic shock

______ Cardiogenic shock

______ Management of severe electrolyte derangements and nutrition

______ Management of renal failure

Display This Question:

If Specialty = Ear, nose, and throat surgery

Q4c Rank the procedures from your field that you think every trauma specialist should know (1 = most important).

______ Tracheostomy

______ Tracheal repair

______ Cricothyroidotomy

______ Neck exploration and vascular repair

______ Epistaxis management

Display This Question:

If Specialty = General surgery

Q4d Rank the procedures from your field that you think every trauma specialist should know (1 = most important).

______ Complex wound debridement and/or closure

______ Diagnostic laparoscopy

______ Splenectomy / splenorrhaphy

______ Nephrectomy

______ Pancreas repair, resection, drainage

______ Gastrectomy, repair of gastric perforation

______ Small intestine resection and anastomosis, lysis of adhesions

______ Colectomy, colostomy

______ Rectal repair

______ Cholecystectomy, common bile duct exploration, hepaticoenterostomy

______ Bladder repair/resection

______ Ureteral repair

______ Abdominal wall reconstruction

Display This Question:

If Specialty = Neurosurgery

Q4e Rank the procedures from your field that you think every trauma specialist should know (1 = most important).

______ Decompressive craniotomy (Burr hole)

______ Craniectomy

______ Prevention of secondary brain injury

______ Mild TBI (concussion) management

______ Neurosurgical interventions are outside the scope of what a trauma specialist should know

Display This Question:

If Specialty = Obstetrics and gynaecology

Q4f Rank the procedures from your field that you think every trauma specialist should know (1 = most important).

______ Cesarean section

______ Hysterectomy

______ Repair of perineal tear

______ Manual / vacuum-assisted evacuation

Display This Question:

If Specialty = Ophthalmology

Q4g Rank the procedures from your field that you think every trauma specialist should know (1 = most important).

______ Lateral canthotomy

______ Management of chemical eye injuries

______ Ophthalmologic interventions are outside the scope of what a trauma specialist should know

Display This Question:

If Specialty = Oral and maxillofacial surgery

Q4h Rank the procedures from your field that you think every trauma specialist should know (1 = most important).

______ Repair of tongue laceration

______ Repair of facial fractures

______ Emergent airway management

______ Epistaxis management

Display This Question:

If Specialty = Orthopaedic surgery

Q4i Rank the procedures from your field that you think every trauma specialist should know (1 = most important).

______ Fasciotomy

______ Limb amputation

______ External fixation

______ Complex wound debridement

Display This Question:

If Specialty = Plastic and reconstructive surgery

Q4j Rank the procedures from your field that you think every trauma specialist should know (1 = most important).

______ Resuscitation of severely burned patients

______ Burn debridement / escharotomy

______ Free flap

______ Skin grafting

Display This Question:

If Specialty = Urology

Q4k Rank the procedures from your field that you think every trauma specialist should know (1 = most important).

______ Bladder repair

______ Nephrectomy

______ Ureteral repair

______ Nephrostomy tube placement

Display This Question:

If Specialty = Vascular surgery

Q4l Rank the procedures from your field that you think every trauma specialist should know (1 = most important).

______ Left/right medial visceral rotation

______ Infrarenal aorta or pelvic exposure

______ Brachial exposure

______ Femoral exposure

______ Arterial repair / bypass

Display This Question:

If Specialty = Other

Q4m Rank the procedures from your field that you think every trauma specialist should know (1 = most important).

- 1. __________________________________________________
- 2. __________________________________________________
- 3. __________________________________________________
- 4. __________________________________________________
- 5. __________________________________________________

Q5 Do you treat traumatically injured patients in your current practice?

- Yes
- No

Display This Question:

If Treat_trauma = Yes

Q6 What percentage of your patients are trauma patients?

- 0-25%
- 26-50%
- 51-75%
- 75-100%

Q7 What is your impression of the current state of care for injured patients at Mulago National Referral Hospital?

- Very satisfied
- Satisfied
- Neutral
- Dissatisfied
- Very dissatisfied

Q8 In your experience, what are the causes of poor outcomes in trauma? (select all that apply)

- Delayed/late presentation to hospital
- No trained specialists in trauma
- Inappropriate/inadequate resuscitation
- Inadequate inpatient care despite good ED resuscitation
- Insufficient/inadequate human resources
- Insufficient/inadequate material resources

Q9 What is your impression of the following statement?
 *There is a role for a surgeon who specializes in the management of traumatically injured patients in the Ugandan setting.*

- Strongly agree
- Agree
- Equivocal
- Disagree
- Strongly disagree

Q10 How necessary is it for a trauma specialist to have familiarity with the care of injured children?

- Very necessary
- Somewhat necessary
- Equivocal
- Unnecessary
- Very Unnecessary

Q11 How long should a TACS fellowship last?

- 12 months
- 18 months
- 24 months

Q12 What is the ideal setting of a TACS fellowship?

- Purely local, with Ugandan faculty
- Purely international at established training programmes
- Hybrid of both local and international mentors

Q13 If Uganda were to have a TACS fellowship program, should it host fellows from  other nations in the region?

- Yes
- No

Display This Question:

If Fellows_other_nations = No

Q14 If you answered "no" above, please explain here:

________________________________________________________________

Q15 What do you think should be the format for the TACS fellowship?

- Trauma surgery only
- Equal parts trauma surgery and surgical critical care
- Mainly trauma surgery with a short-term rotation in surgical critical care
- Trauma surgery with some emergency general surgery (management of bowel perforation, appendicitis, cholecystitis)
- Some combination of trauma surgery, emergency general surgery, and surgical critical care

Q16 Why do you think has been the hindrance of surgeons pursuing a career in trauma? (select all that apply)

- Lack of a training program in Uganda
- No current specialists in trauma to inspire trainees
- Lack of proper trauma systems in Uganda
- Lack of interest by surgeons
- Lack of recognition of need for specialized training
- Large amount of non-operative care, less time in the OR

Q17 What do you perceive as barriers to establishing a TACS fellowship in Uganda? (select all that apply)

- Lack of trauma infrastructure (supplies, OR time/space)
- No available faculty to train the fellows
- Lack of funding
- Lack of accreditation at present (no certifying body)
- No trauma fellowship curriculum
- Poor employment prospects after training

Q18 What do you perceive as facilitating factors in the establishment of a TACS fellowship in Uganda? (select all that apply)

- Motivated faculty
- Motivated residents
- High burden of injured patients
- Potential for political/ministry support
- Established accreditation pathway in other specialties (urology, pediatric surgery)

Q19 How do you think the presence of a TACS fellowship in Uganda would affect productivity and learning opportunities? (select all that apply)

- It would increase efficiency and improve overall staffing.
- It would improve patient outcomes.
- It would enhance learning for other trainees and medical students.
- It would add redundant physicians to the team.
- It would take away learning opportunities from other trainees.

Q20 What other comments or thoughts about a TACS fellowship in Uganda would you like to share?

________________________________________________________________

________________________________________________________________

________________________________________________________________

________________________________________________________________

________________________________________________________________

Q21 Thank you for your time in answering these questions. Please provide your phone number so we can send you a small monetary compensation for your effort.

- Phone number (numbers only): __________________________________________________

## Resident Survey Questions

Q1 What is your age?

- 20-30 years
- 31-40 years
- 41-50 years
- 51+ years

Q2 What is your gender?

- Female
- Male

Q3 In which year of residency are you currently?

- 1
- 2
- 3

Q4 Have you completed your trauma rotation?

- No
- Yes

Display This Question:

If Trauma_rotation = Yes

Q5 How prepared were you to manage complex trauma patients after your rotation?

- Very prepared
- Adequately prepared
- Somewhat prepared
- Mostly unprepared
- Not at all prepared

Display This Question:

If Trauma_rotation = Yes

Q6 How do you feel about the current state of care for injured patients at Mulago National Referral Hospital?

- Very satisfied
- Satisfied
- Neutral
- Dissatisfied
- Very dissatisfied

Q7 In your experience, what are the causes of poor outcomes in trauma? (select all that apply)

- Delayed/late presentation to hospital
- No trained specialists in trauma
- Inappropriate/inadequate resuscitation
- Inadequate inpatient care despite good ED resuscitation
- Insufficient/inadequate human resources
- Insufficient/inadequate material resources

Q8 Would you consider a TACS fellowship and a career in trauma surgery?

- Yes
- No
- Unsure

Q9 What are some of the reasons that draw you toward or away from pursuing a TACS fellowship? (select all that apply)

- It would allow me to better take care of injured patients (reduce mortality from trauma)
- It would allow me to better take care of critically ill patients
- It has not been done before, and I want to have a specialized trauma skill set
- It has not been done before, and that makes me worried
- All surgeons should be able to handle all trauma
- This specialty is not yet recognized by the government
- There is no accrediting body for trauma surgeons in Uganda
- It is a very stressful carrier choice
- There are no trained trauma specialists to serve as role models

Q10 Upon completion of your surgical training, would you want to work as a surgical critical care doctor in the ICU periodically/on rotation?

- Yes
- No
- Unsure

Q11 Would being a trauma surgeon be more appealing if it included emergency general surgery, surgical critical care, or both? (select all that apply)

- Trauma Surgery
- Emergency General Surgery
- Surgical Critical Care

Q12 Where should a TACS fellowship take place?

- Purely local by Ugandan mentors
- Purely international at already established training programmes
- Hybrid of both local and international or local and international mentors

Q13 How long should a TACS fellowship be?

- 12 months
- 18 months
- 24 months

Q14 What other comments or thoughts about a TACS fellowship in Uganda would you like to share?

________________________________________________________________

________________________________________________________________

________________________________________________________________

________________________________________________________________

________________________________________________________________

Q25 Thank you for your time in answering these questions. Please provide your phone number so we can send you a small monetary compensation for your effort.

- Phone number (numbers only): __________________________________________________
